# Supplementary material
Source: PubMed Central journal article supplement (PMC6647992)
Supplement: ao8b02851_si_001.pdf [file ao8b02851_si_001.pdf]

## Supporting Information

### Two-step fractionation of a model technical lignin by combined organic solvent extraction and membrane ultrafiltration

Chiara Allegretti,<sup>a</sup> Simon Fontanay,<sup>b</sup> Klaus Rischka,<sup>c</sup> Alberto Strini,<sup>d</sup> Julien Troquet,<sup>b</sup>  
Stefano Turri,<sup>a</sup> Gianmarco Griffini,<sup>a\*</sup> Paola D'Arrigo<sup>a,e\*</sup>

<sup>a</sup>*Department of Chemistry, Materials and Chemical Engineering "Giulio Natta", Politecnico of Milano, p.zza L. da Vinci 32, Milano, 20133, Italy*

<sup>b</sup>*Biobasic Environnement, Biopôle Clermont-Limagne, Saint-Beauzire, 63360, France*

<sup>c</sup>*Fraunhofer Institute for Manufacturing Technology and Advanced Materials IFAM, Wiener Str. 12, 28359 Bremen, Germany*

<sup>d</sup>*Construction Technologies Institute - National Research Council of Italy (ITC-CNR), via Lombardia 49, San Giuliano Mil., 20098, Italy*

<sup>e</sup>*Istituto di Chimica del Riconoscimento Molecolare, CNR, via Mario Bianco 9, Milano, 20131, Italy.*

\*Corresponding authors:

gianmarco.griffini@polimi.it; phone: +39 2 2399 3213; fax: +39 2 23993280

paola.darrigo@polimi.it; phone: +39 2 23993075; fax: +39 2 23993180

## CONTENT

|                                                                                                                               |            |
|-------------------------------------------------------------------------------------------------------------------------------|------------|
| <b>Figure S1:</b> Apparatus used in the Fractionation process of a solution of Protobind 1000.                                | <b>S3</b>  |
| <b>Table S2:</b> Operational parameters for the membrane assisted ultrafiltration process                                     | <b>S4</b>  |
| <b>Figure S3:</b> Comparison between the extraction yields (% w/w) of Protobind 1000 and Kraft Lignins in different solvents. | <b>S5</b>  |
| <b>Figure S4:</b> Molecular weight distribution of all extracted lignin fractions as obtained from GPC analysis.              | <b>S6</b>  |
| <b>Figure S5:</b> Calibration Curve of Folin-Ciocalteu phenol titration with gallic acid.                                     | <b>S7</b>  |
| <b>Figure S6:</b> GC/MS Chromatogram of LF-S.                                                                                 | <b>S8</b>  |
| <b>Table S7:</b> GC/MS Results of LF-S.                                                                                       | <b>S9</b>  |
| <b>Figure S8:</b> GC/MS Chromatogram of LF-R5.                                                                                | <b>S10</b> |
| <b>Table S9:</b> GC/MS Results of LF-R5.                                                                                      | <b>S11</b> |
| <b>Figure S10:</b> GC/MS Chromatogram of LF-P5.                                                                               | <b>S12</b> |
| <b>Table S11:</b> GC/MS Results of LF-P5.                                                                                     | <b>S13</b> |
| <b>Figure S12</b> GC/MS Chromatogram of LF-R2.                                                                                | <b>S14</b> |
| <b>Table S13:</b> GC/MS Results of LF-R2.                                                                                     | <b>S15</b> |
| <b>Figure S14:</b> GC/MS Chromatogram of LF-P2.                                                                               | <b>S16</b> |
| <b>Table S15:</b> GC/MS Results of LF-P2.                                                                                     | <b>S17</b> |
| <b>Figure S16:</b> TGA curves of the lignins LF-0 and LF-S                                                                    | <b>S18</b> |
| <b>Figure S17:</b> Identification of the main compounds identified in Pyr-GC/MS analysis of LF-0 at 600°C.                    | <b>S19</b> |
| <b>Table S18:</b> Peak Identification of Protobind 1000 pyrolysed at 450 °C.                                                  | <b>S20</b> |

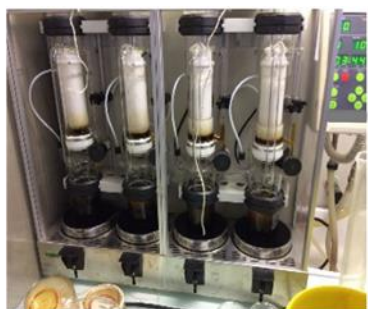

Panel A

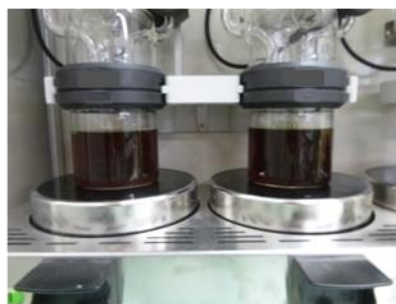

Panel B

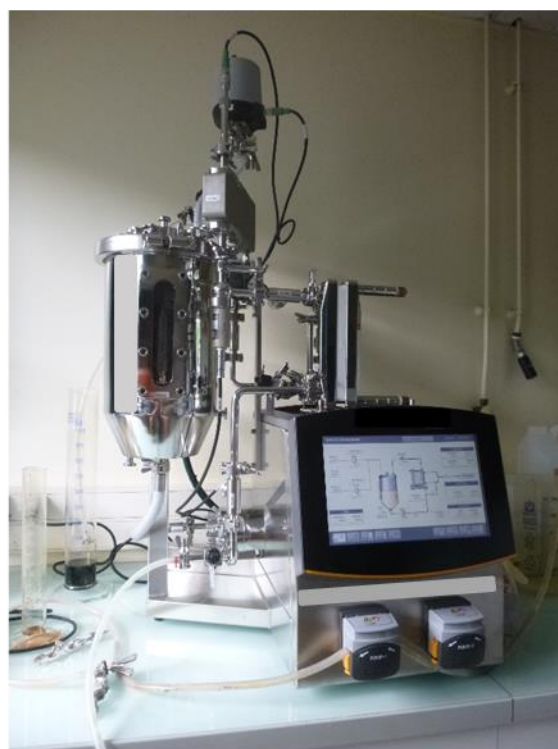

Panel C

Figure S1: Apparatus used in the Fractionation process of a solution of Protobind 1000. (Panel A: Soxhlet extraction, Panel B: Details of solvent beakers, Panel C: Ultrafiltration apparatus; Photograph courtesy of Julien Troquet Copyright 2018).

|                      | Ultrafiltration process data | Unit                                                        | Average values from 3 successive filtration trials    |                                                       |
|----------------------|------------------------------|-------------------------------------------------------------|-------------------------------------------------------|-------------------------------------------------------|
|                      |                              |                                                             | Step 1                                                | Step 2                                                |
| <b>Membrane data</b> | Membrane type                |                                                             | SARTORIUS STEDIM<br>Hydrosart<br>(305 144 29 01 E-SW) | SARTORIUS STEDIM<br>Hydrosart<br>(305 144 19 01 E-SW) |
|                      | Membrane material            |                                                             | Stabilized cellulose                                  | Stabilized cellulose                                  |
|                      | Membrane area                | m <sup>2</sup>                                              | 0.1                                                   | 0.1                                                   |
|                      | Cut-off                      | kDa                                                         | 5                                                     | 2                                                     |
|                      | Clean water flow (CWF)       | L min <sup>-1</sup> m <sup>-2</sup>                         | 24                                                    | 18                                                    |
| <b>Process data*</b> | Cross flow                   | L min <sup>-1</sup>                                         | 1                                                     | 0.5                                                   |
|                      | Feed pressure                | bar                                                         | 2.5                                                   | 2.5                                                   |
|                      | TMP                          | bar                                                         | 1.92                                                  | 1.74                                                  |
|                      | Permeate flow                | mL min <sup>-1</sup><br>L min <sup>-1</sup> m <sup>-2</sup> | 0.2<br>0.002                                          | 2.2<br>0.022                                          |
|                      | Time to process 500 mL       | min                                                         | 900                                                   | 80                                                    |

\* Data obtained from 3 successive trials each realized with a starting volume of 1.5 L of the soluble extracted fraction (LF-S). The 3 trials have been runned with the same membranes which have been cleaned and tested (clean water flow measurement) between each trial.

Table S2: Operational parameters for the membrane assisted ultrafiltration process.

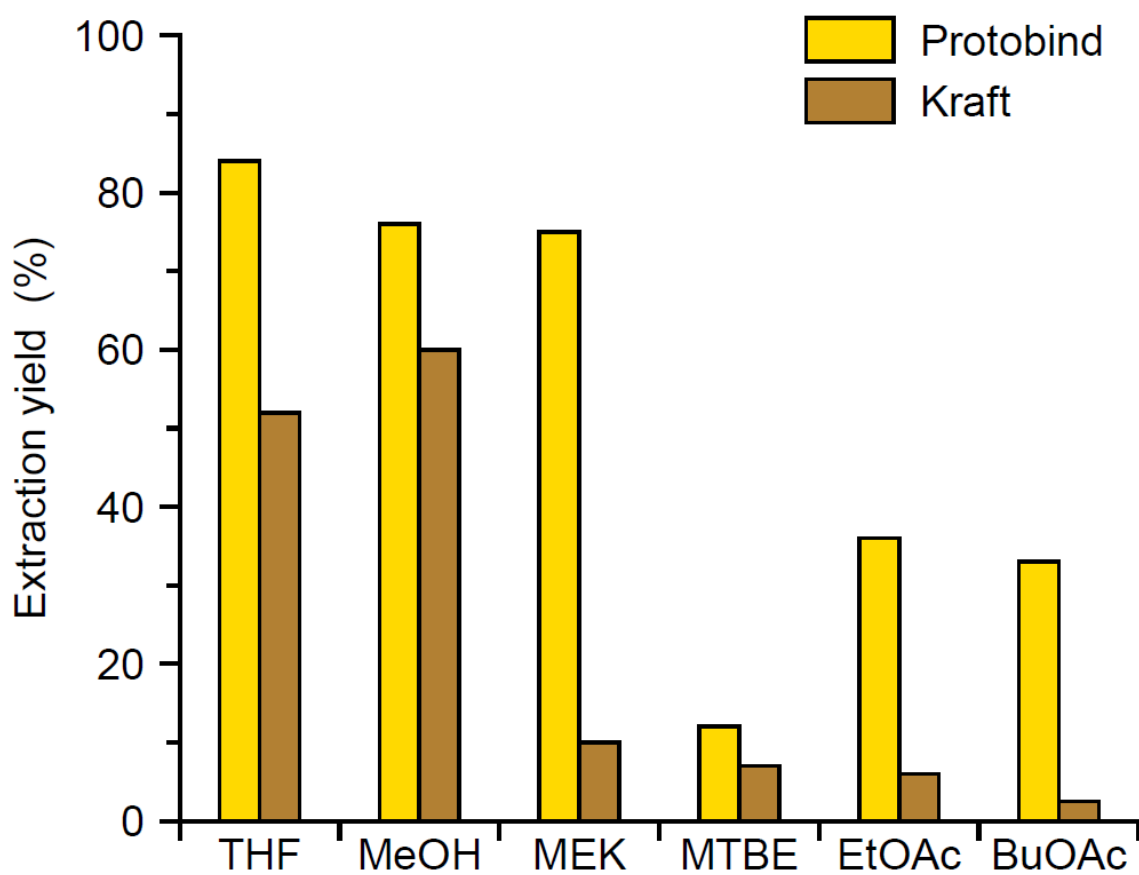

Figure S3: Comparison between the extraction yields (% w/w) of Protobind 1000 and Kraft Lignins in different solvents.

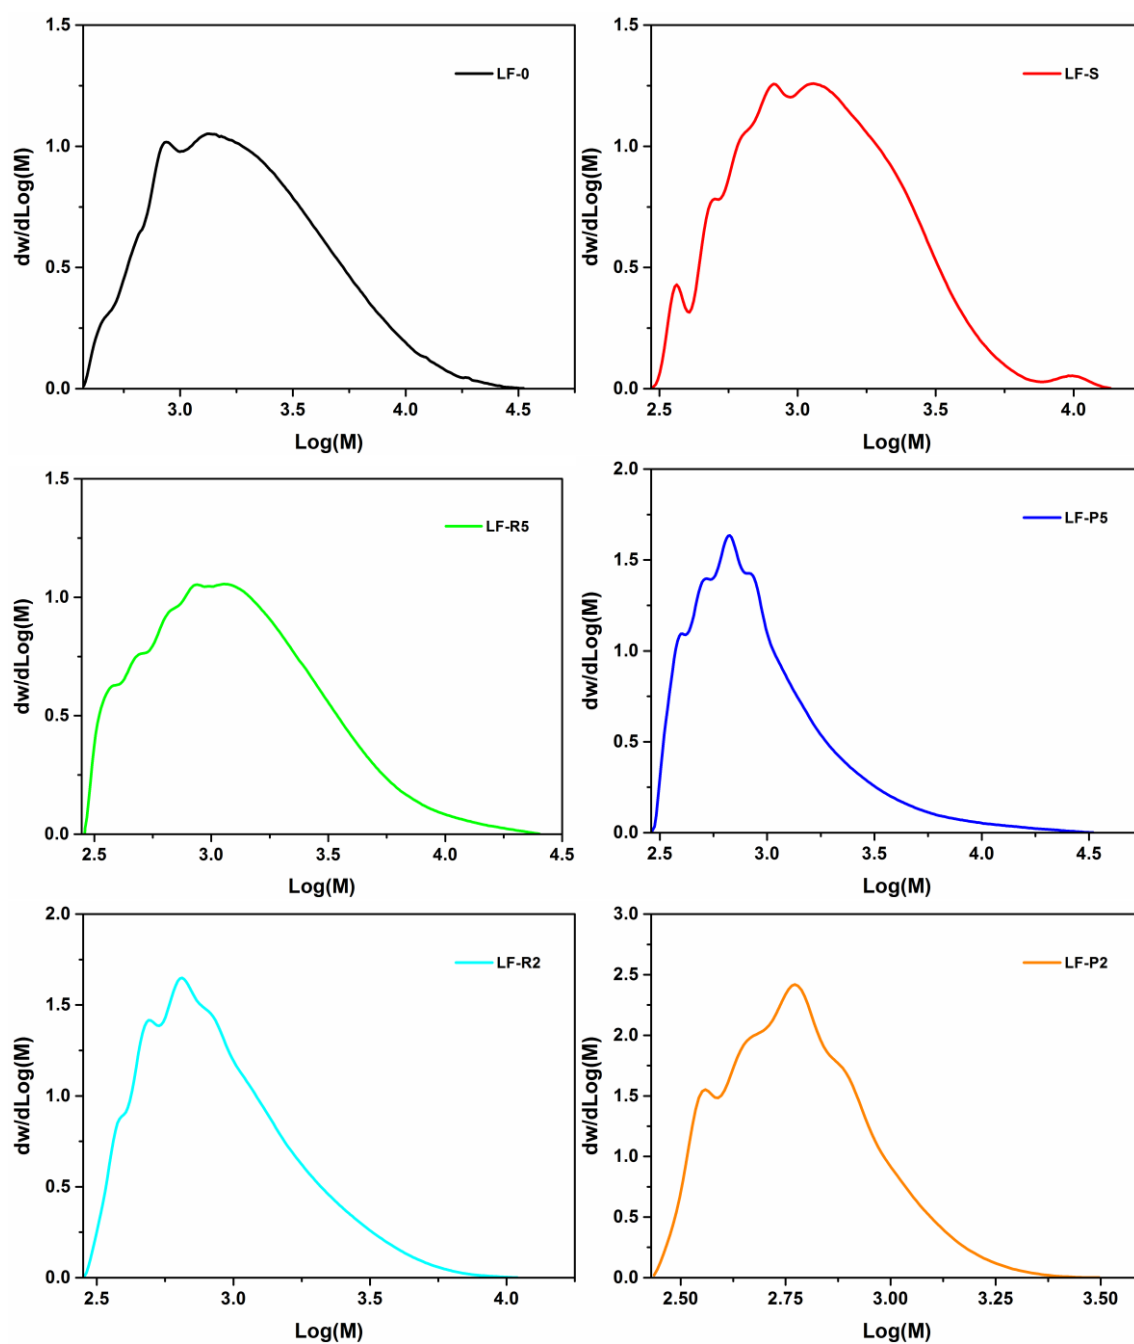

Figure S4: Molecular weight distributions of all extracted lignin fractions as obtained from GPC analysis (the parent material LF-0 is also reported as reference). Samples were acetylated prior to analysis.

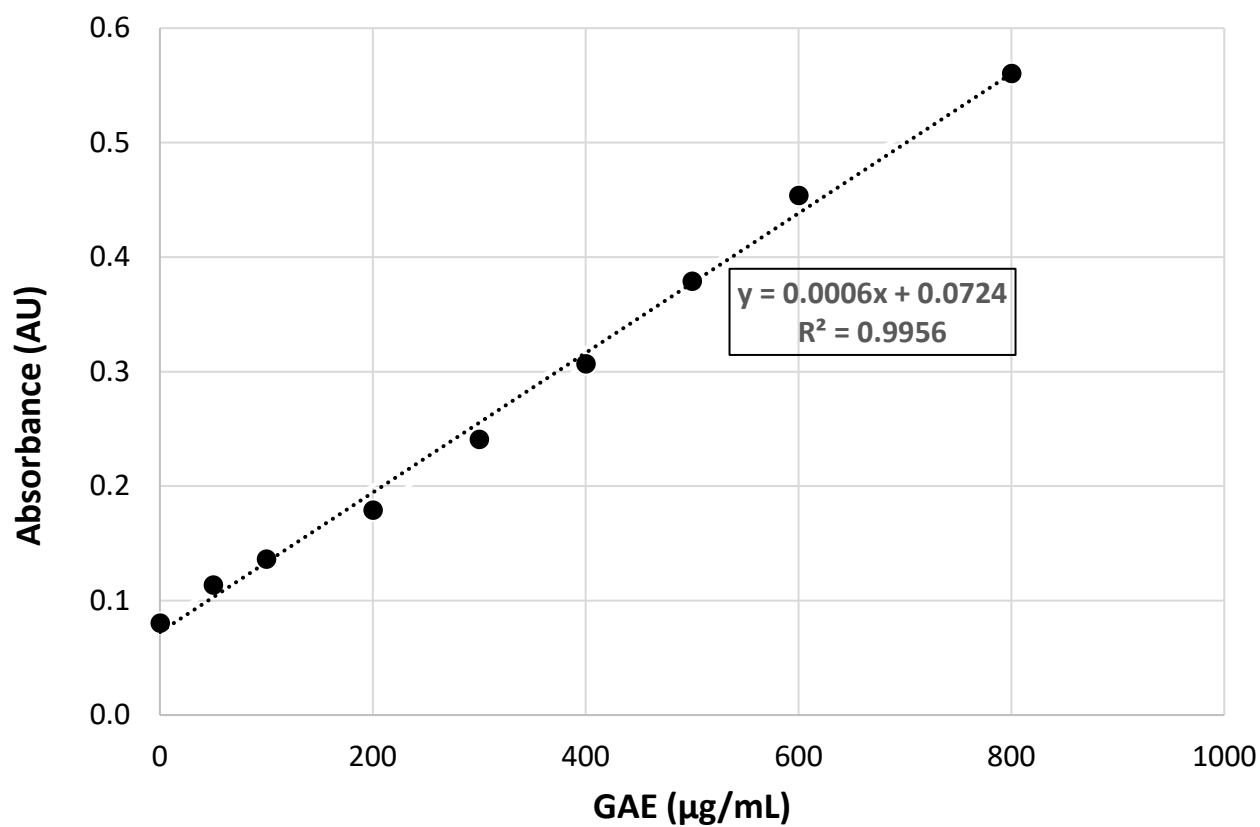

Figure S5: Calibration Curve of Folin-Ciocalteu phenol titration with gallic acid.

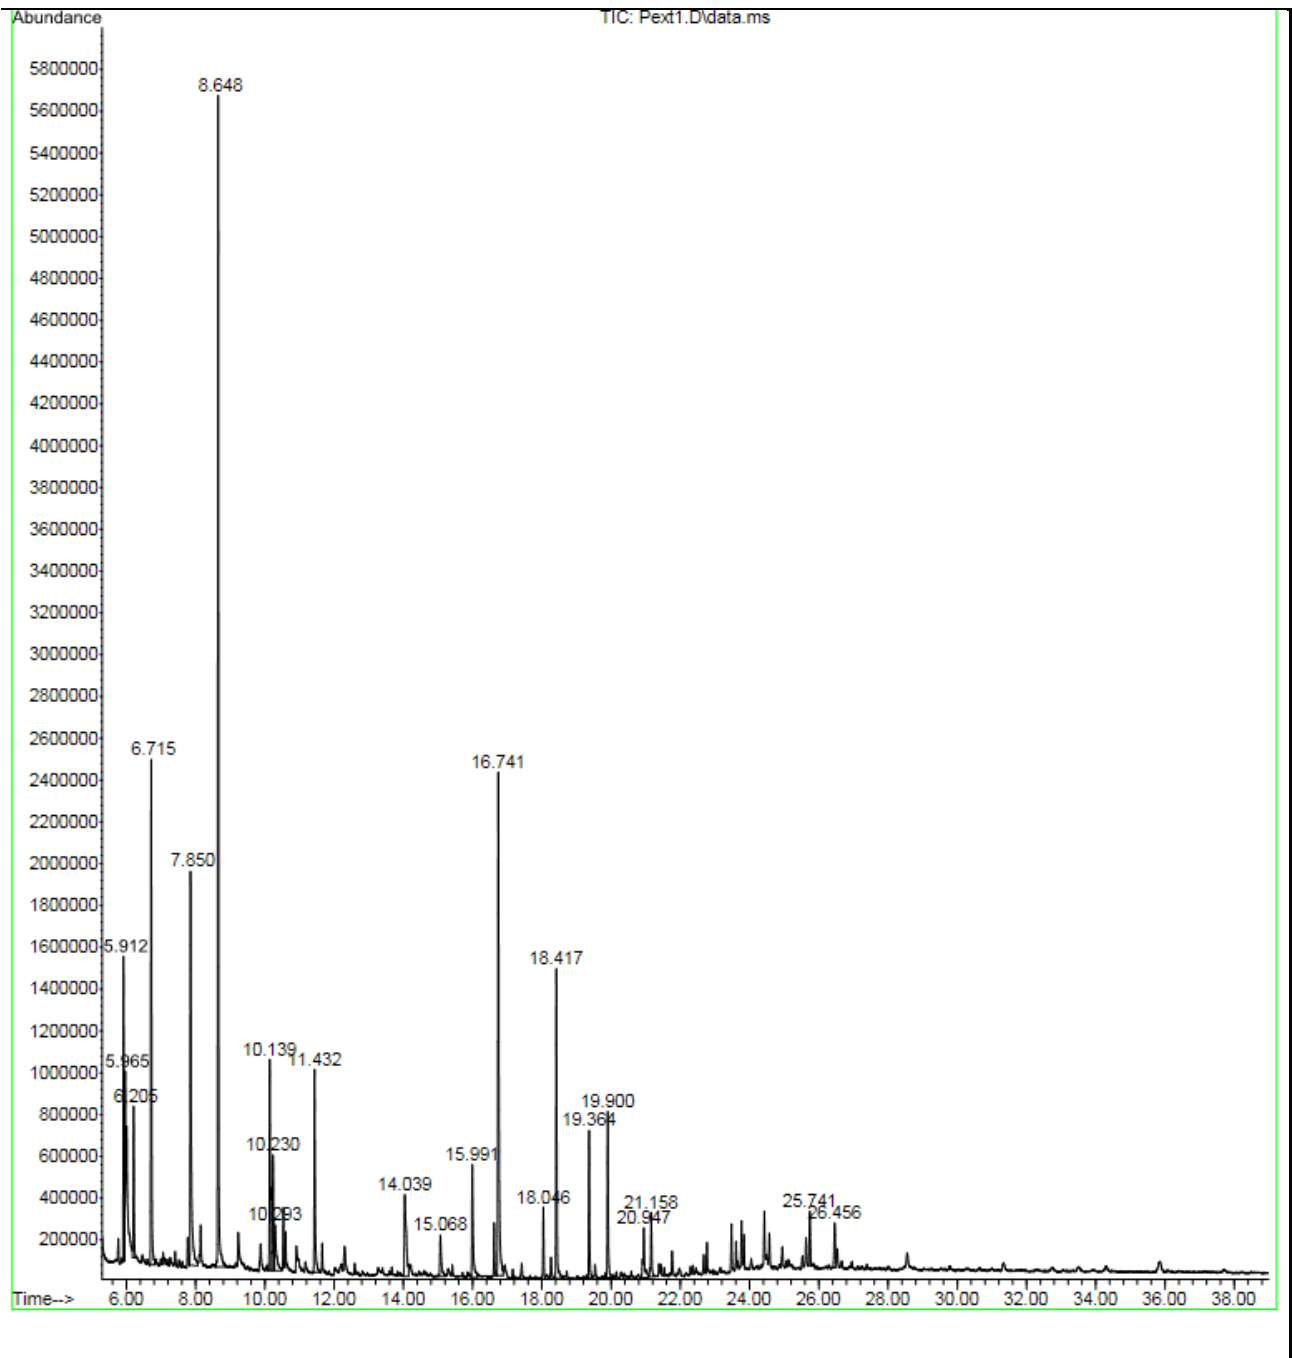

Figure S6: GC/MS chromatogram of LF-S.



| Retention time (min) | Molecule                                                                            | Name                                          | % in the analysis |
|----------------------|-------------------------------------------------------------------------------------|-----------------------------------------------|-------------------|
| 14                   | 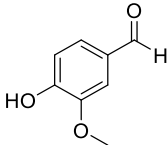   | 4-hydroxy-3-methoxybenzaldehyde               | 3.4               |
| 15                   |    | 1-(4-hydroxy-3-methoxyphenyl)ethan-1-one      | 1.3               |
| 15.9                 |    | 4-hydroxy-3,5-dimethoxybenzaldehyde           | 3                 |
| 16.74                |    | 1-(4-hydroxy-3,5-dimethoxyphenyl)ethan-1-one  | 11                |
| 18                   |   | 4-hydroxy-3,5-dimethoxybenzoic acid           | 1.3               |
| 18.4                 |  | (E)-3-(4-hydroxyphenyl)acrylic acid           | 5.9               |
| 19.3                 |  | hexadecanoic acid                             | 2.6               |
| 19.9                 |  | (E)-3-(3-hydroxy-4-methoxyphenyl)acrylic acid | 3.38              |

Table S7: GC/MS Results of LF-S.

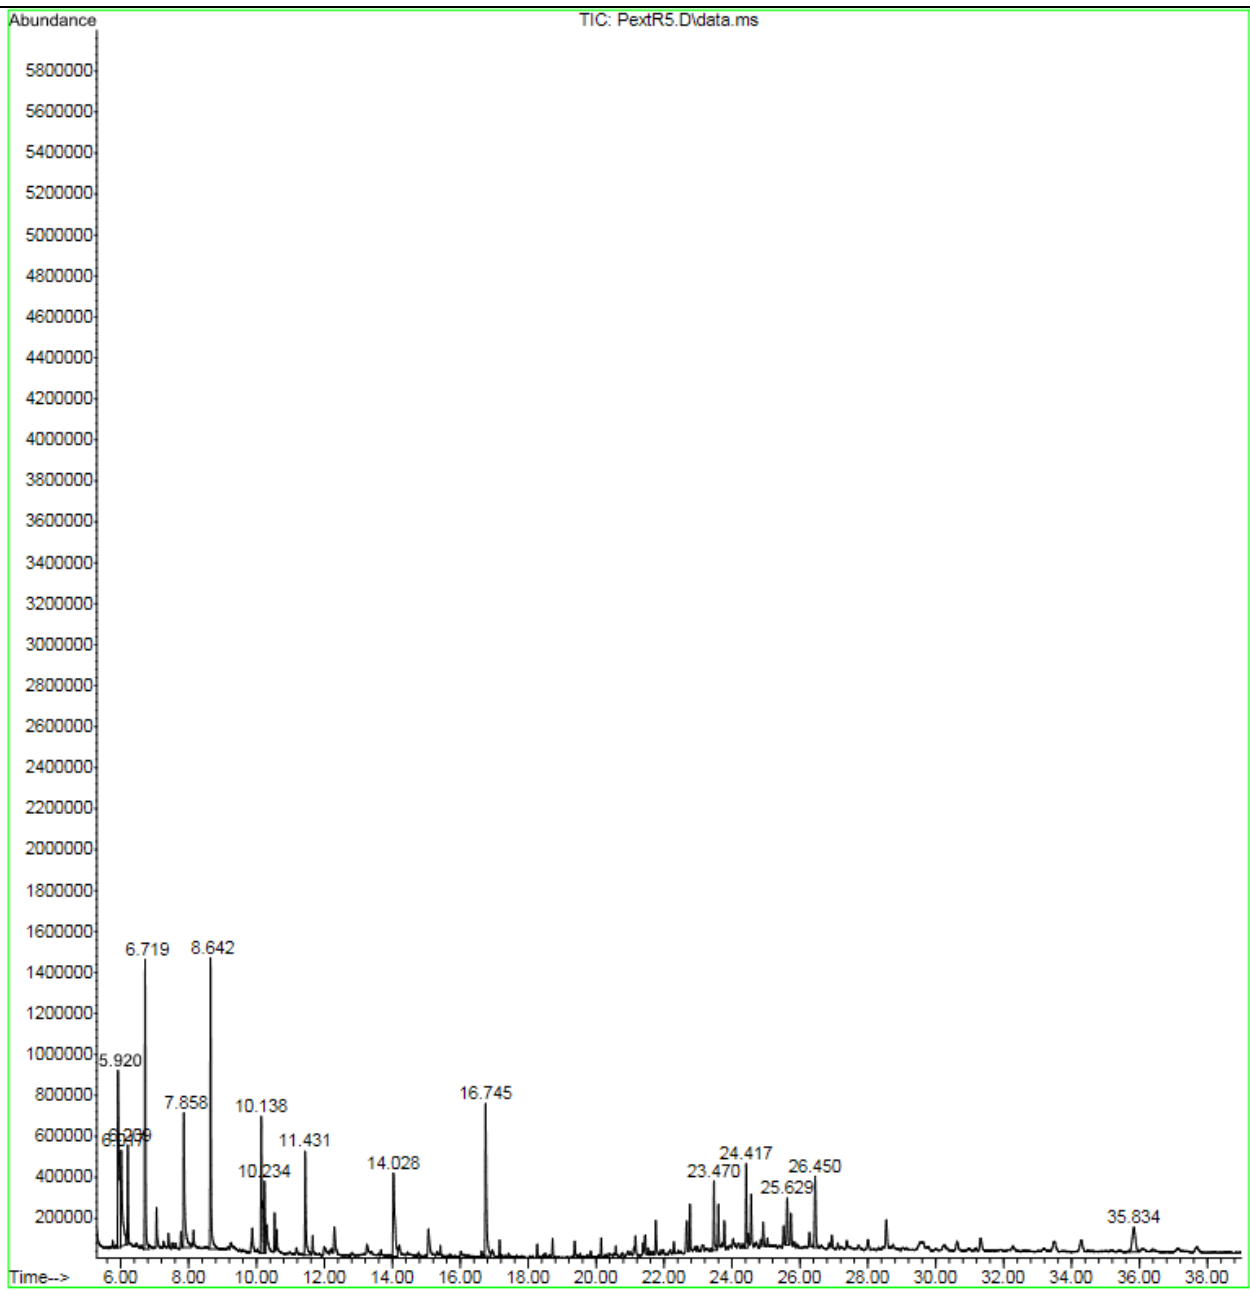

Figure S8: GC/MS chromatogram of LF-R5.

| Retention time (min) | Molecule                                                                          | Name                                         | % in the analysis |
|----------------------|-----------------------------------------------------------------------------------|----------------------------------------------|-------------------|
| 14                   | 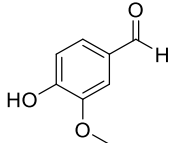 | 4-hydroxy-3-methoxybenzaldehyde              | 14.9              |
| 16.7                 |  | 1-(4-hydroxy-3,5-dimethoxyphenyl)ethan-1-one | 18.1              |

Table S9: GC/MS Results of LF-R5.

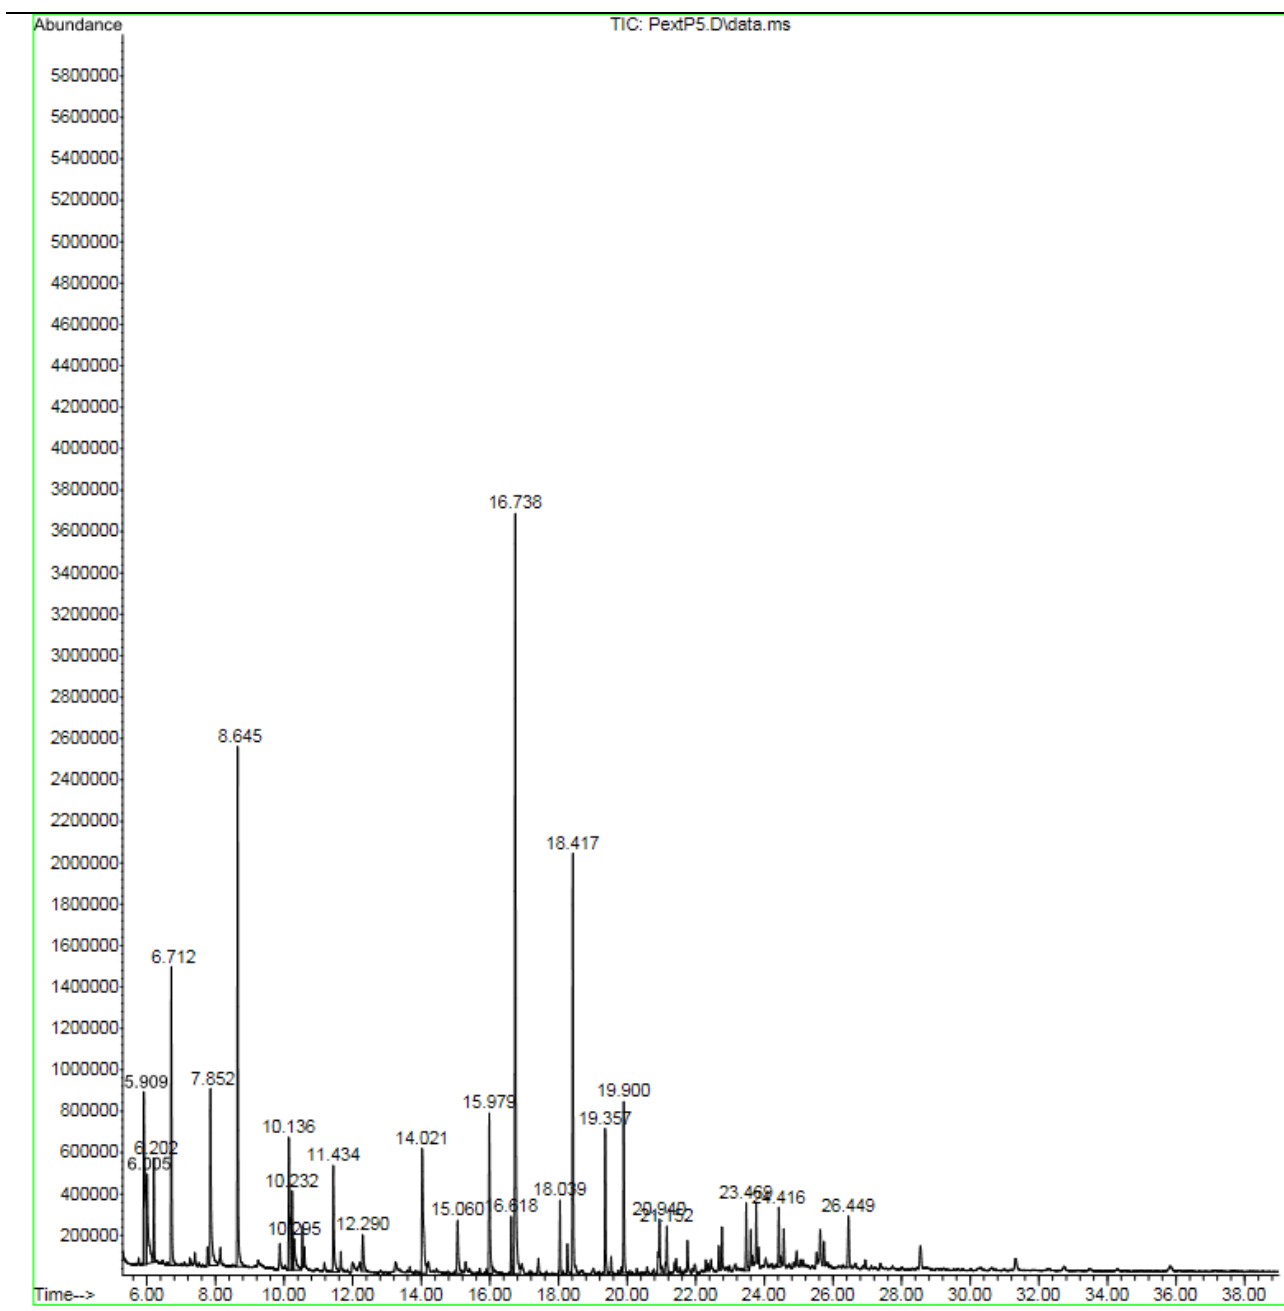

Figure S10: GC/MS chromatogram of LF-P5.

| Retention time (min) | Molecule                                                                            | Name                                          | % in the analysis |
|----------------------|-------------------------------------------------------------------------------------|-----------------------------------------------|-------------------|
| 14                   | 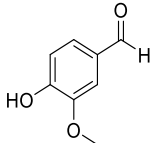   | 4-hydroxy-3-methoxybenzaldehyde               | 4.9               |
| 15                   |    | 1-(4-hydroxy-3-methoxyphenyl)ethan-1-one      | 1.9               |
| 15.9                 |    | 4-hydroxy-3,5-dimethoxybenzaldehyde           | 4.3               |
| 16.74                |    | 1-(4-hydroxy-3,5-dimethoxyphenyl)ethan-1-one  | 17.5              |
| 18                   |   | 4-hydroxy-3,5-dimethoxybenzoic acid           | 1.5               |
| 18.4                 |  | (E)-3-(4-hydroxyphenyl)acrylic acid           | 8.7               |
| 19.3                 |  | hexadecanoic acid                             | 3.2               |
| 19.9                 |  | (E)-3-(3-hydroxy-4-methoxyphenyl)acrylic acid | 3.6               |

Table S11: GC/MS Results of LF-P5.

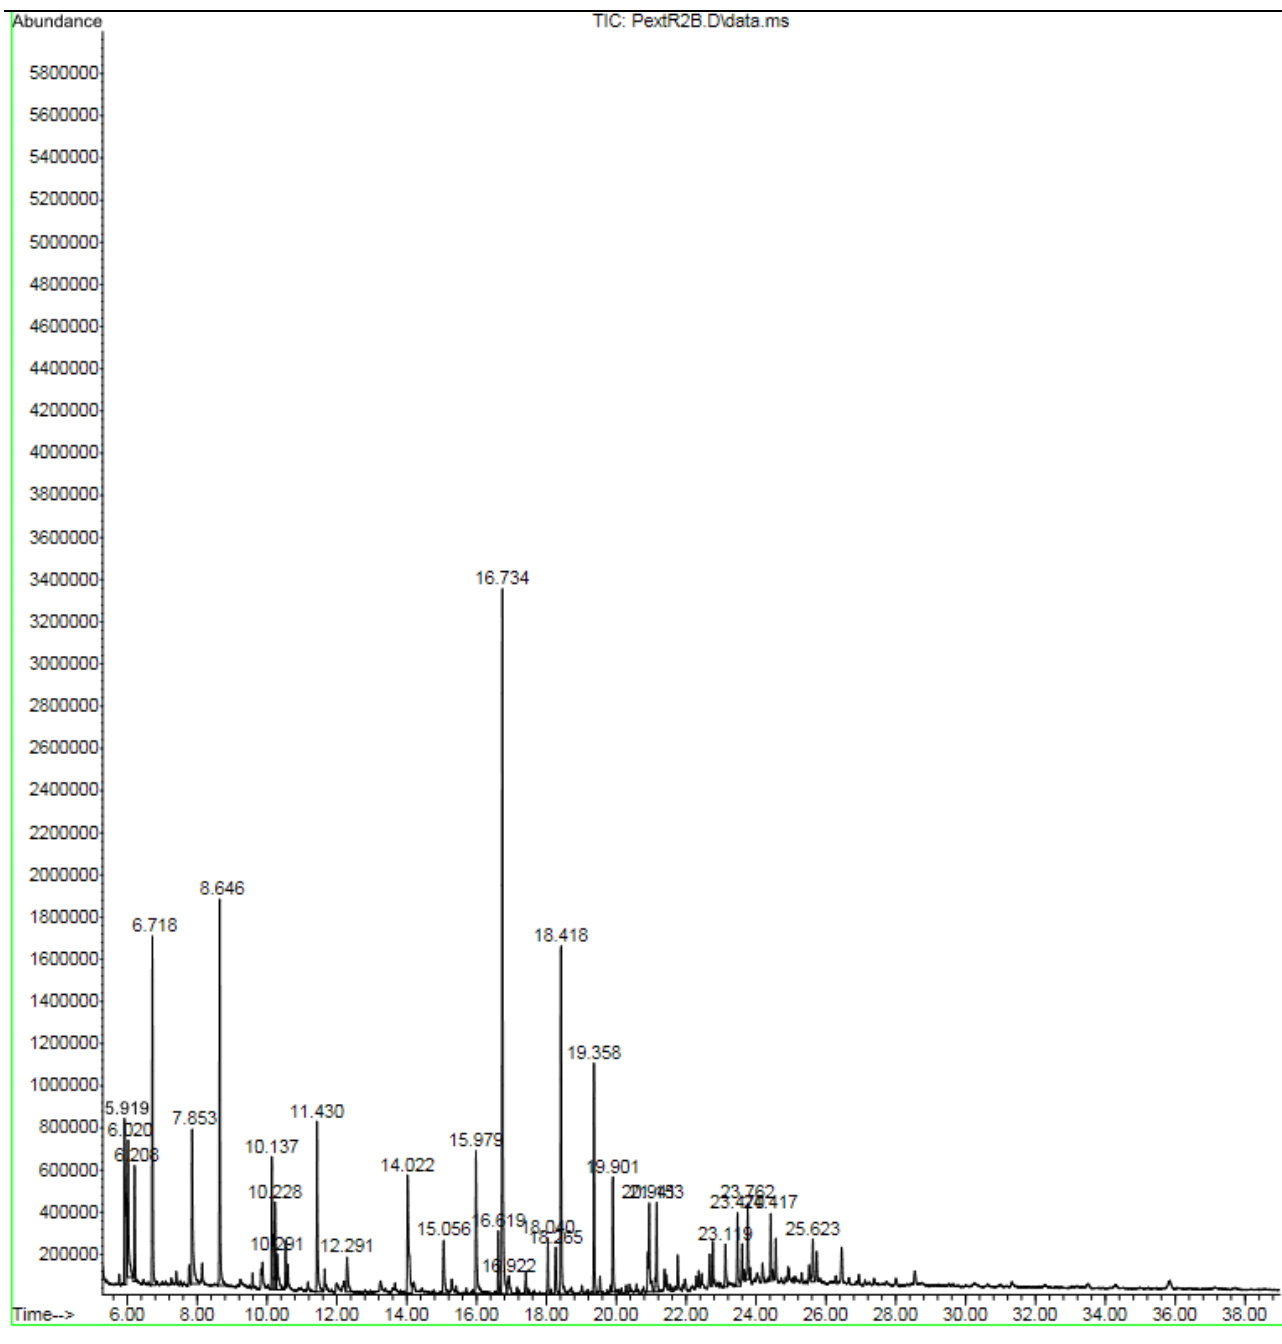

Figure S12: GC/MS chromatogram of LF-R2.

| Retention time (min) | Molecule                                                                            | Name                                          | % in the analysis |
|----------------------|-------------------------------------------------------------------------------------|-----------------------------------------------|-------------------|
| 14                   | 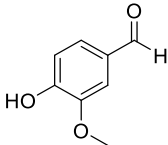   | 4-hydroxy-3-methoxybenzaldehyde               | 6.3               |
| 15                   |    | 1-(4-hydroxy-3-methoxyphenyl)ethan-1-one      | 2.7               |
| 15.9                 |    | 4-hydroxy-3,5-dimethoxybenzaldehyde           | 5.7               |
| 16.74                |    | 1-(4-hydroxy-3,5-dimethoxyphenyl)ethan-1-one  | 22                |
| 18                   |   | 4-hydroxy-3,5-dimethoxybenzoic acid           | 1.6               |
| 18.4                 |  | (E)-3-(4-hydroxyphenyl)acrylic acid           | 10.6              |
| 19.3                 |  | hexadecanoic acid                             | 6.2               |
| 19.9                 |  | (E)-3-(3-hydroxy-4-methoxyphenyl)acrylic acid | 3.4               |

Table S13: GC/MS Results of LF-R2.

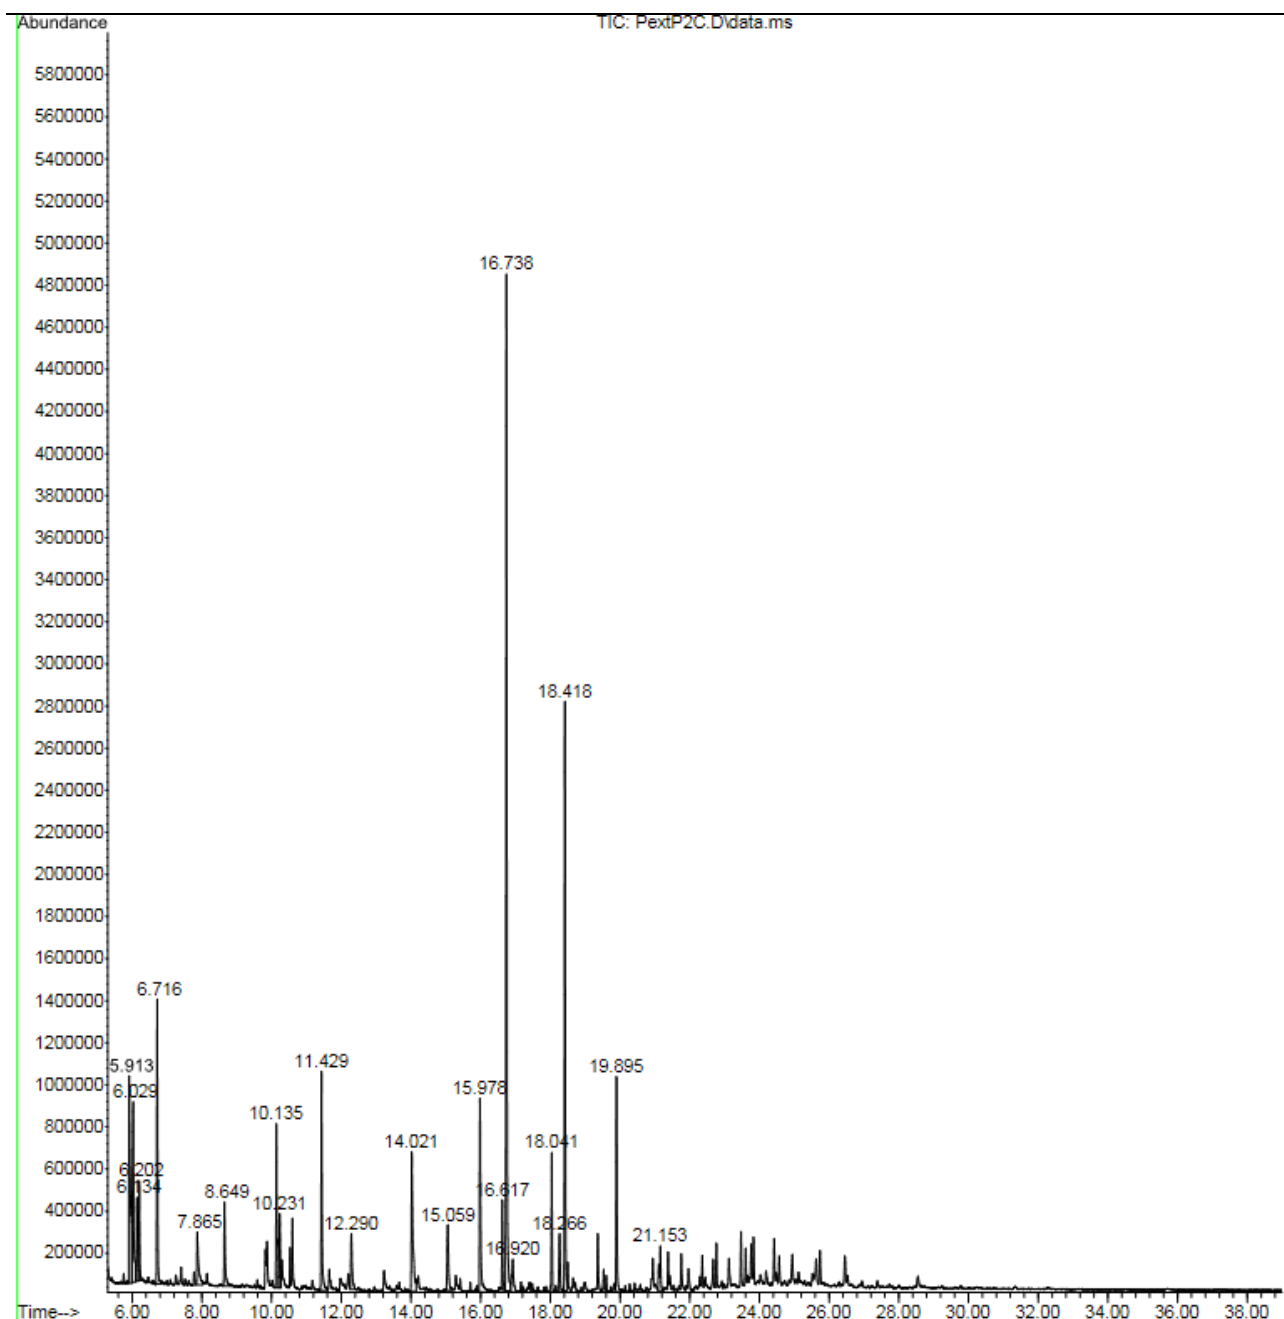

Figure S14: GC/MS chromatogram of LF-P2.



| Retention time (min) | Molecule                                                                            | Name                                          | % in the analysis |
|----------------------|-------------------------------------------------------------------------------------|-----------------------------------------------|-------------------|
| 14                   | 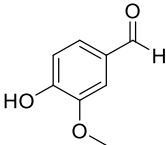   | 4-hydroxy-3-methoxybenzaldehyde               | 6.9               |
| 15                   |    | 1-(4-hydroxy-3-methoxyphenyl)ethan-1-one      | 3.2               |
| 15.9                 |    | 4-hydroxy-3,5-dimethoxybenzaldehyde           | 7.3               |
| 16.74                |    | 1-(4-hydroxy-3,5-dimethoxyphenyl)ethan-1-one  | 30                |
| 18                   |   | 4-hydroxy-3,5-dimethoxybenzoic acid           | 3.7               |
| 18.4                 |  | (E)-3-(4-hydroxyphenyl)acrylic acid           | 15.4              |
| 19.9                 |  | (E)-3-(3-hydroxy-4-methoxyphenyl)acrylic acid | 6.4               |

Table S15: GC/MS Results of LF-P2.

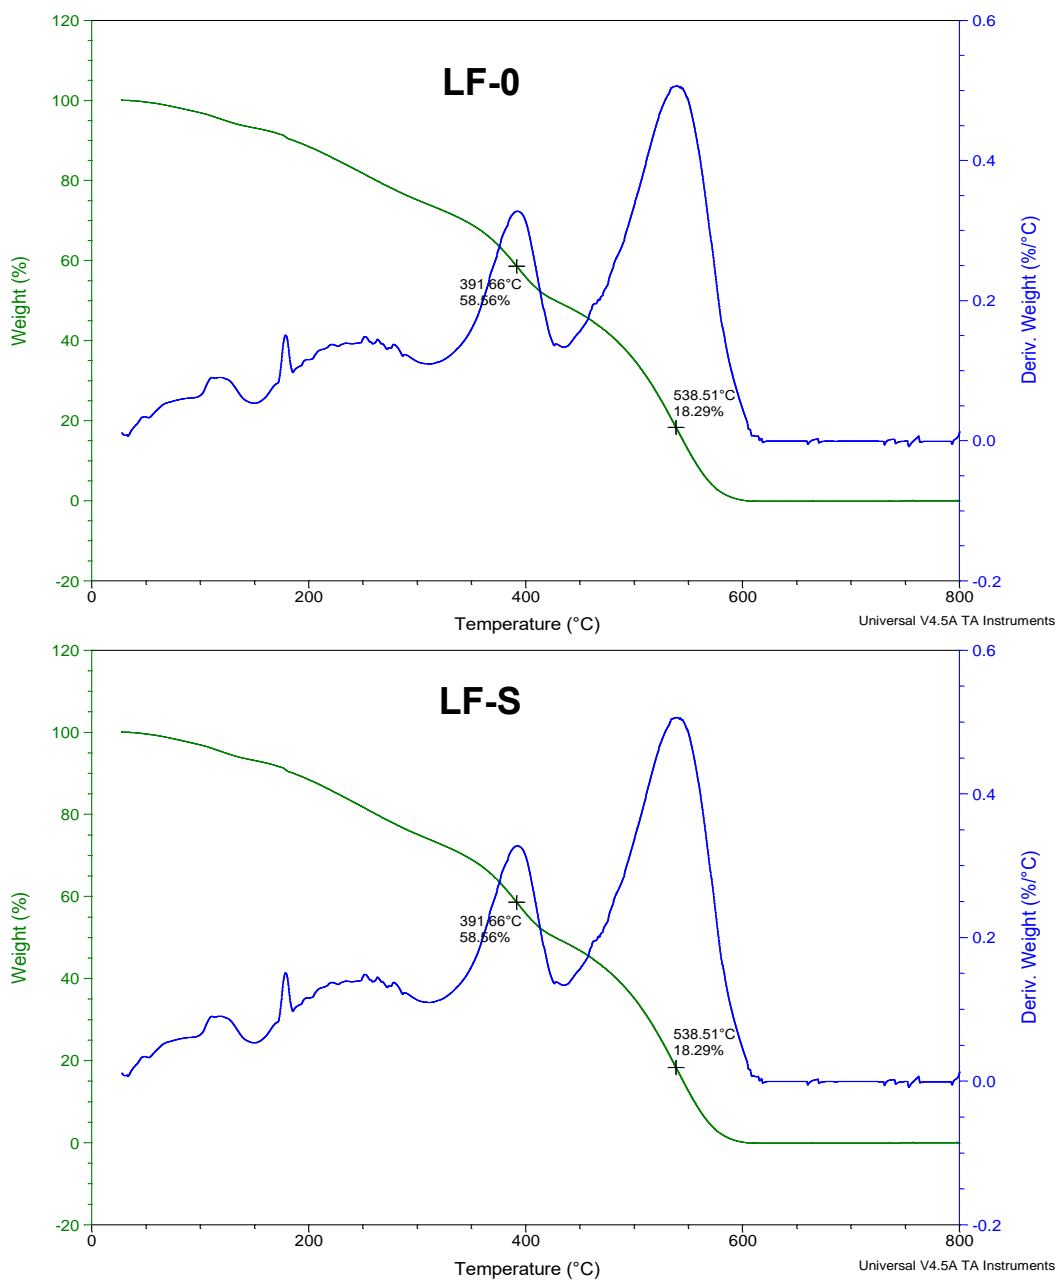

Figure S16: TGA curves of the lignin samples LF-0 (above) and LF-S (below) evaluated by Pyr-GC/MS. The weight loss is indicated by the green line (left green scale) The first derivation of the weight loss is indicated by the blue line (right blue scale).

RT: 0.00 - 78.85

NL:  
1.10E9  
TIC MS  
Proto1000

Protobind 1000 @ 600°C

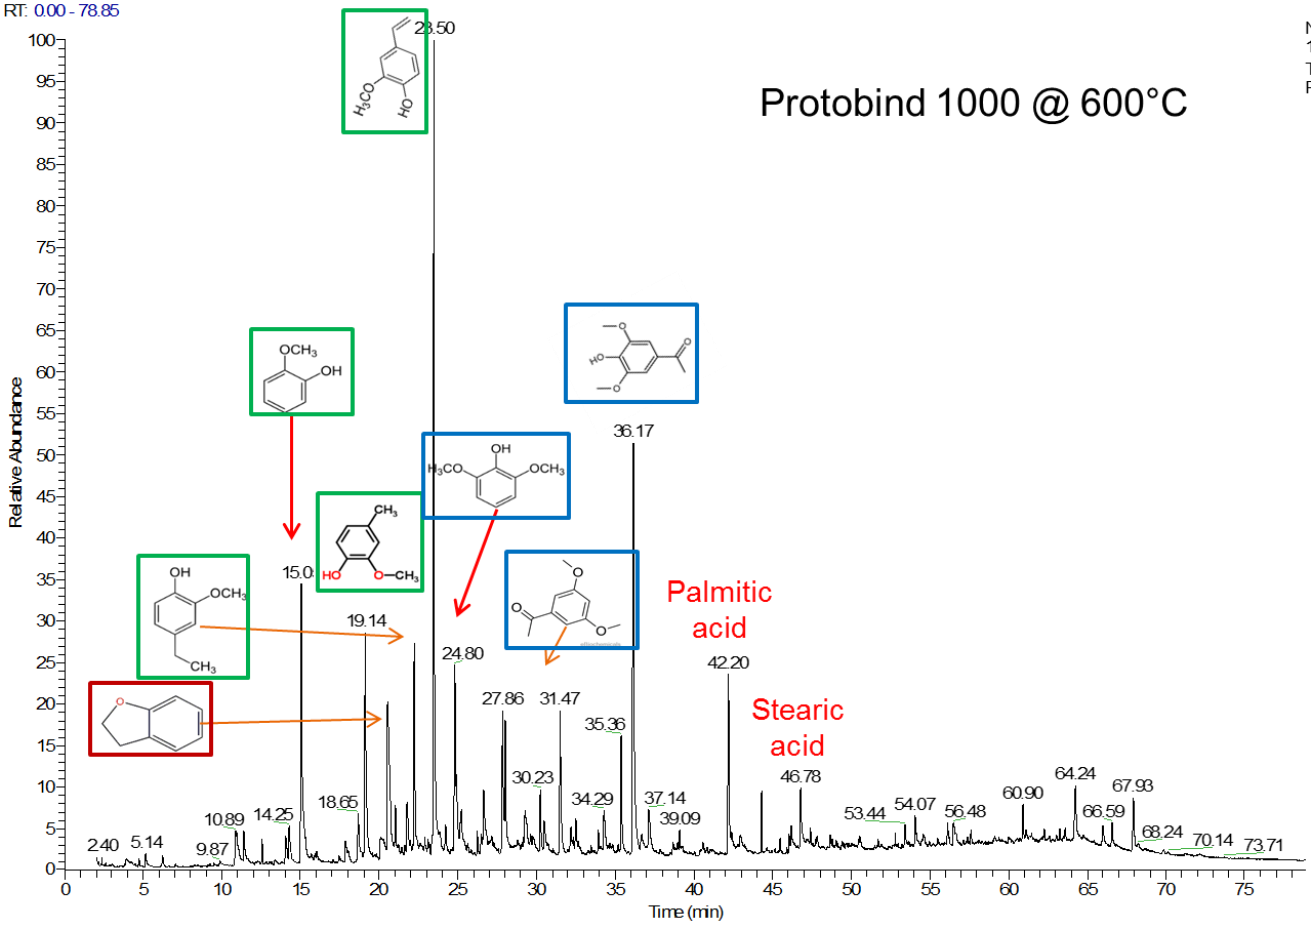

Figure S17: Identification of the main compounds identified in Pyr-GC/MS analysis of LF-0 at 600 °C.

| <b>Apex RT [min]</b> | <b>CAS-Nr.</b> | <b>Name of Compound</b>                          | <b>Unit</b> |
|----------------------|----------------|--------------------------------------------------|-------------|
| 2.22                 | 74-93-1        | Methanthiol                                      |             |
| 4.26                 | 937-61-1       | Benzylpropylether                                | C           |
| 5.95                 | 98-01-1        | Furfural                                         | C           |
| 7.08                 | 106-42-3       | p-Xylene                                         | C           |
| 10.63                | 20602-79-3     | acryloylurea                                     | C           |
| 11.54                | 108-95-2       | Phenol                                           | H           |
| 13.11                | 1461-27-4      | m-Mentha-6,8-diene                               |             |
| 14.35                | 95-48-7        | o-Cresol                                         | H           |
| 15.2                 | 106-44-5       | p-Cresol                                         | H           |
| 15.35                | 90-05-1        | o-Methoxyphenol                                  | G           |
| 18.57                | 123-07-9       | p-Ethylphenol                                    | H           |
| 18.72                | 18102-31-3     | 2-Methoxy-3-methylphenol                         | G           |
| 19.23                | 93-51-3        | Creosol                                          | G           |
| 20.04                | 120-80-9       | Catechol                                         |             |
| 20.51                | 496-16-2       | Coumaran                                         |             |
| 21.64                | 934-00-9       | 3-Methoxy-pyrocatechol                           | S           |
| 22.22                | 2785-89-9      | p-Ethylguaiaicol                                 | G           |
| 23.25                | 488-17-5       | 3-Methylpyrocatechol                             |             |
| 23.52                | 7786-61-0      | 2-Methoxy-4-vinylphenol                          | G           |
| 24.07                | 3209-13-0      | 3-Methoxy-5-Methylphenol                         |             |
| 24.75                | 91-10-1        | 2,6-Dimethoxyphenol (Syringol)                   | S           |
| 24.88                | 97-53-0        | Eugenol                                          | G           |
| 25.01                | 2033-89-9      | 3,4-Dimethoxyphenol                              | S           |
| 25.2                 | 2785-87-7      | 2-Methoxy-4-propylphenol                         | G           |
| 26.15                | 6380-23-0      | 3,4-Dimethoxystyrene                             | G           |
| 26.35                | 121-33-5       | Vanillin                                         | G           |
| 26.56                | 5932-68-3      | trans-Isoeugenol                                 | G           |
| 27.79                | 135-77-3       | 1,2,4-Trimethoxybenzene                          | S           |
| 27.95                | 5932-68-3      | trans-Isoeugenol                                 | G           |
| 29.05                | 6100-74-9      | 1-(3-Hydroxy-4-methoxyphenyl)ethanone (apocynin) | G           |
| 30.14                | 6443-69-2      | 3,4,5-Trimethoxytoluene                          | S           |
| 30.29                | 2503-46-0      | Guaiacylacetone                                  | G           |
| 32.4                 | 6627-88-9      | 4-allyl-2,6-dimethoxyphenol                      | S           |
| 34.1                 | 134-96-3       | 3,5-Dimethoxygallaldehyde                        | S           |
| 35.27                | 6627-88-9      | 4-allyl-2,6-dimethoxyphenol                      | S           |
| 36.11                | 2478-38-8      | 4'-Hydroxy-3',5'-Dimethoxyacetophenone           | S           |
| 36.35                | 458-35-5       | 4-[(1E)-3-Hydroxy-1-propenyl]-2-methoxyphenol    |             |
| 36.97                | 437-72-9       | 1-(2,6-Dihydroxy-4-methoxyphenyl)-1-butanone     |             |

Table S18: Peak Identification of Protobind 1000 pyrolysed at 450 °C.
